# Supplementary material for: Adhesive Functions or Pseudogenization of Type Va Autotransporters in Brucella Species
Source: PubMed Central journal article supplement (PMC8111173; doi:10.3389/fcimb.2021.607610), 2021-04-27
Supplement: Image_3.pdf [file Image_3.pdf]

Figure S3

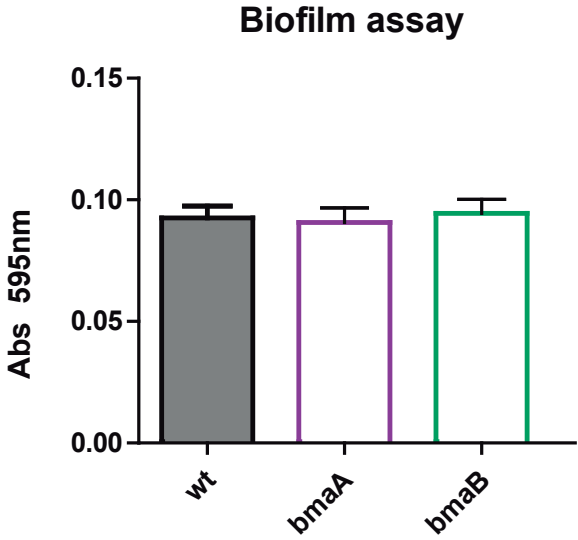

**Supplementary Figure 3: Adherence of *B. suis* strains to an abiotic surface.**

Binding to polystyrene (PE) microtiter plates of *B. suis* wild type, *bmaA::stops* and *bmaB::Km* was assayed. Attached bacteria were quantified by staining with crystal violet.

Data represent the means and standard deviations (SD) of the results of a representative experiment done in triplicate. Three independent experiments were performed with similar results.
