# Supplementary material for: Adhesive Functions or Pseudogenization of Type Va Autotransporters in Brucella Species
Source: PubMed Central journal article supplement (PMC8111173; doi:10.3389/fcimb.2021.607610), 2021-04-27
Supplement: Image_4.pdf [file Image_4.pdf]

Figure S4

A.

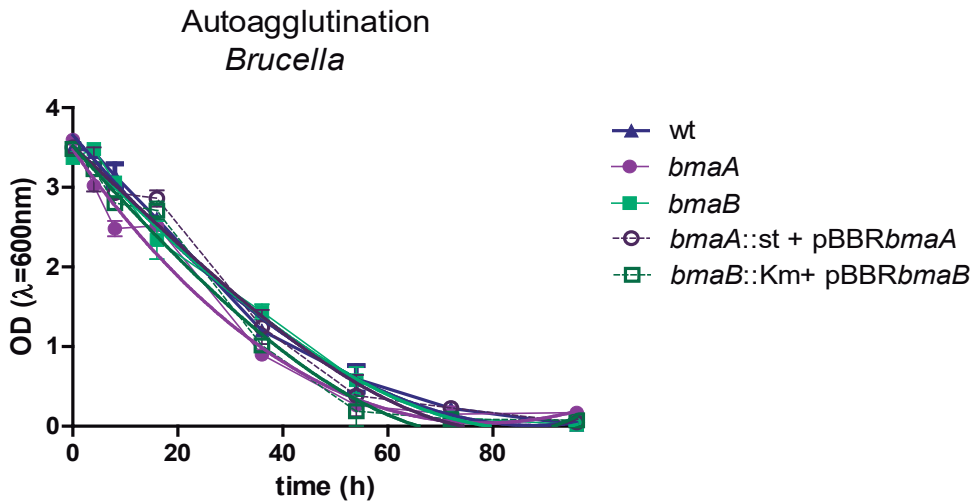

B.

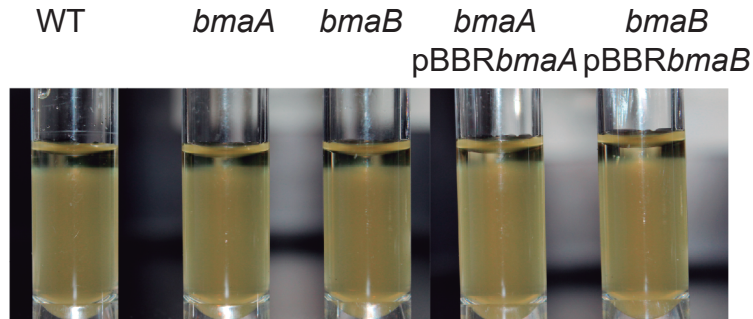

C.

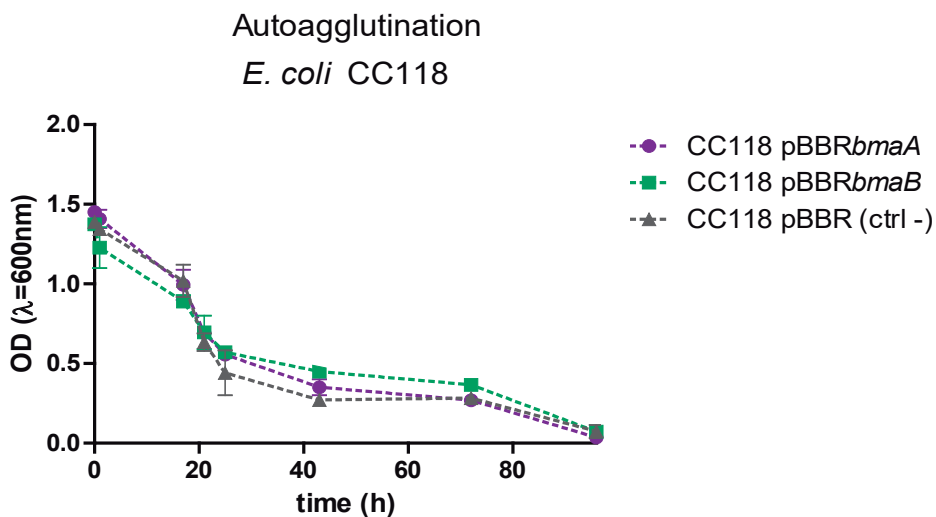

Supplementary Figure 4: **Autoagglutination analysis.**

The sedimentation ability of (A) *B. suis* wt, *bmaA::stops* (*bmaA*) and *bmaB::Km* (*bmaB*) and the complemented mutants; and (C) *E. coli* CC118 pBBR1, *E. coli* CC118 pBBR1*bmaA*, *E. coli* CC118 pBBR1*bmaB* was assayed.

Bacterial sedimentation was measured comparing the optical density (OD<sub>600</sub>) in the upper portion of the tubes at different time points for a period of 96 hours.

(B) The image corresponds to *Brucella* cultures grown in a rich medium and was let stand for 48 h.
